# Supplementary material for: Efficacy and Safety of Rechallenge with BRAF/MEK Inhibitors in Advanced Melanoma Patients: A Systematic Review and Meta-Analysis
Source: MDPI journal article supplement (doi:10.3390/cancers15153754), 2023-07-25
Supplement: s1 [file s1]

Study

Risk of bias domains

|                      | D1                                                                                | D2                                                                                 | D3                                                                                  | D4                                                                                  | D5                                                                                  | D6                                                                                  | D7                                                                                  | Overall                                                                             |
|----------------------|-----------------------------------------------------------------------------------|------------------------------------------------------------------------------------|-------------------------------------------------------------------------------------|-------------------------------------------------------------------------------------|-------------------------------------------------------------------------------------|-------------------------------------------------------------------------------------|-------------------------------------------------------------------------------------|-------------------------------------------------------------------------------------|
| Schreuer et al. 2017 |  |  |  |  |  |  |  |  |

Domains:

D1: Bias due to confounding.

D2: Bias due to selection of participants.

D3: Bias in classification of interventions.

D4: Bias due to deviations from intended interventions.

D5: Bias due to missing data.

D6: Bias in measurement of outcomes.

D7: Bias in selection of the reported result.

Judgement

 Moderate

 Low
