# Supplementary material for: Efficacy and Safety of Rechallenge with BRAF/MEK Inhibitors in Advanced Melanoma Patients: A Systematic Review and Meta-Analysis
Source: MDPI journal article supplement (doi:10.3390/cancers15153754), 2023-07-25
Supplement: s1 [file s1]

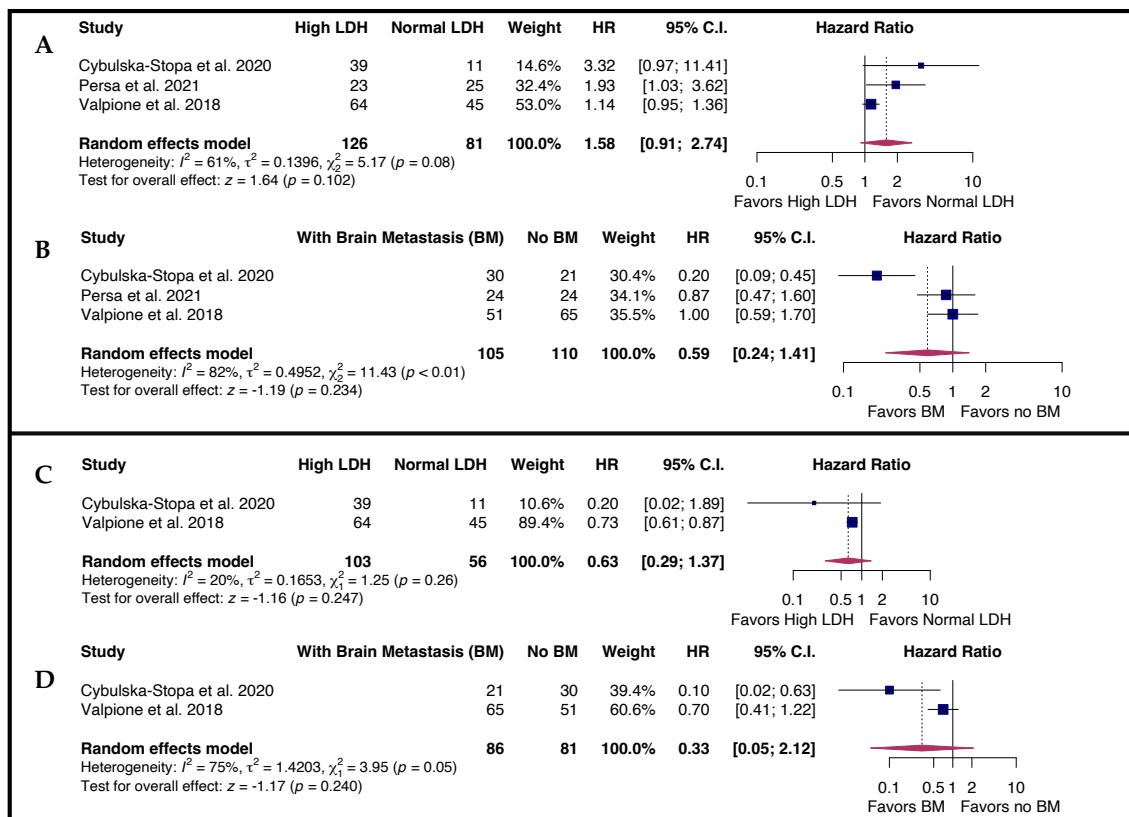

**Figure S2.** Prognostic factors associated with OS (A and B) and PFS (C and D).

Interpretation of each forest plot:

**A:** Patients with elevated LDH levels had a 58% higher risk of death than those with normal LDH, which did not reach statistical significance (HR = 1.58,  $p = 0.102$ ).

**B:** The absence of brain metastasis (BM) non-significantly decreased the risk of death by 41% compared with the presence of BM (HR = 0.59,  $p = 0.234$ ).

**C:** Normal LDH was associated with a non-significant reduction of disease progression or death compared to high LDH levels (HR = 0.63,  $p = 0.247$ ).

**D:** Patients without BM had a non-significant decrease of 66% in the risk of progression or death compared to patients with BM (HR = 0.33,  $p = 0.240$ ).
