# Supplementary figures and images for: Efficacy and Safety of Rechallenge with BRAF/MEK Inhibitors in Advanced Melanoma Patients: A Systematic Review and Meta-Analysis
Source: MDPI journal article supplement (doi:10.3390/cancers15153754), 2023-07-25

A

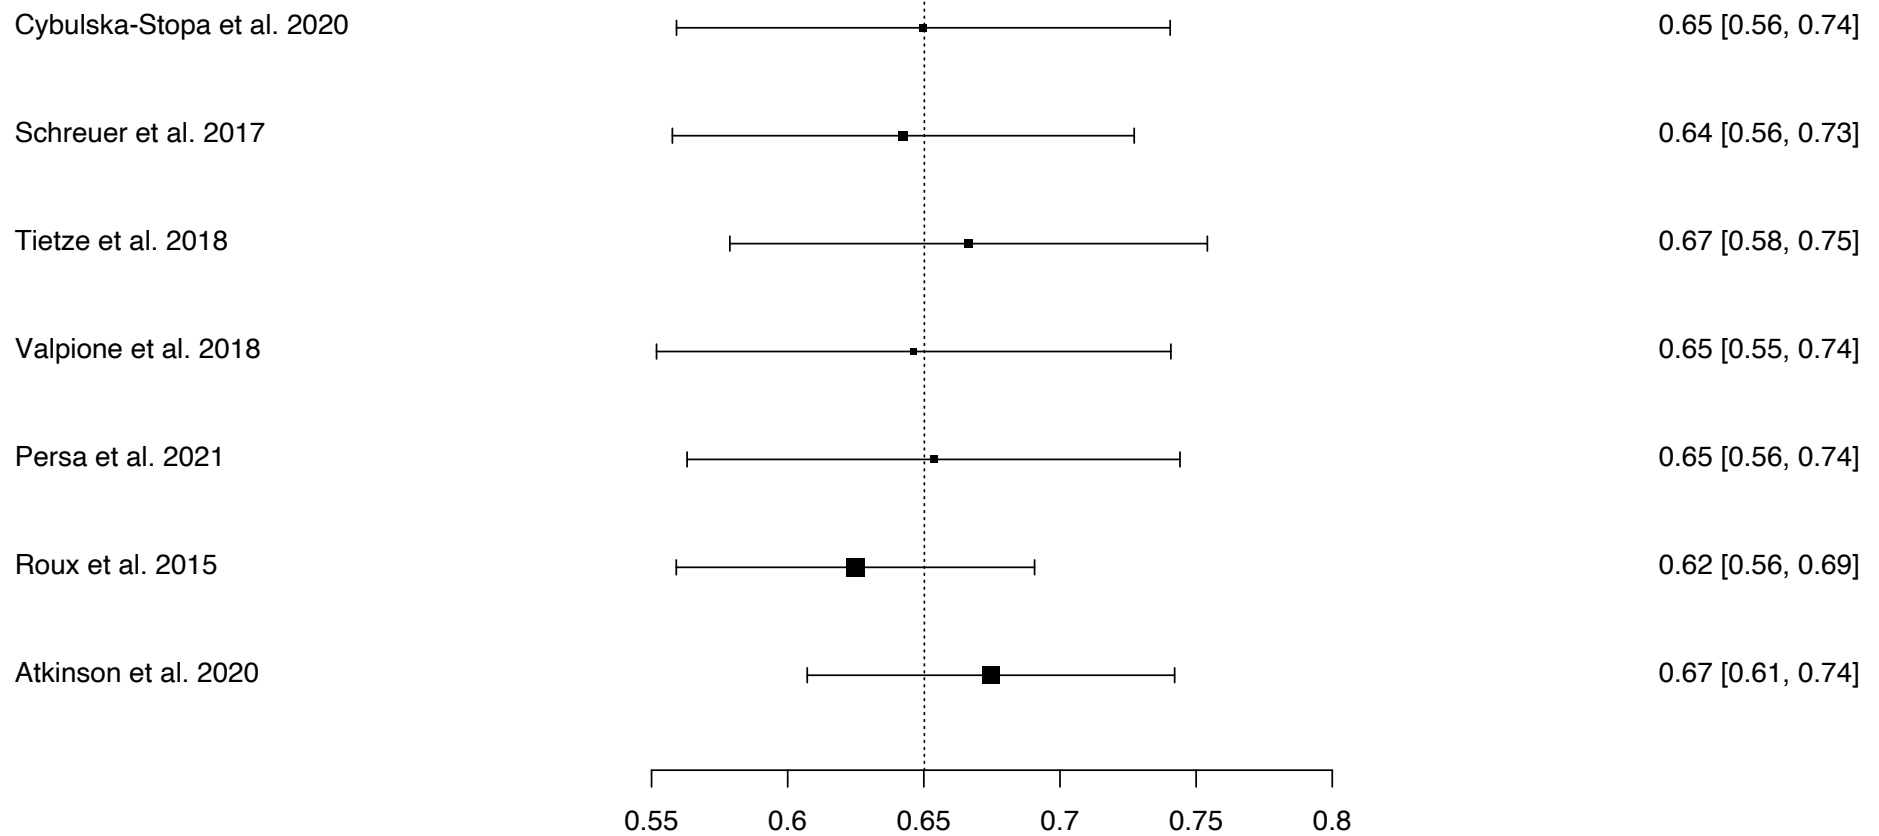

B

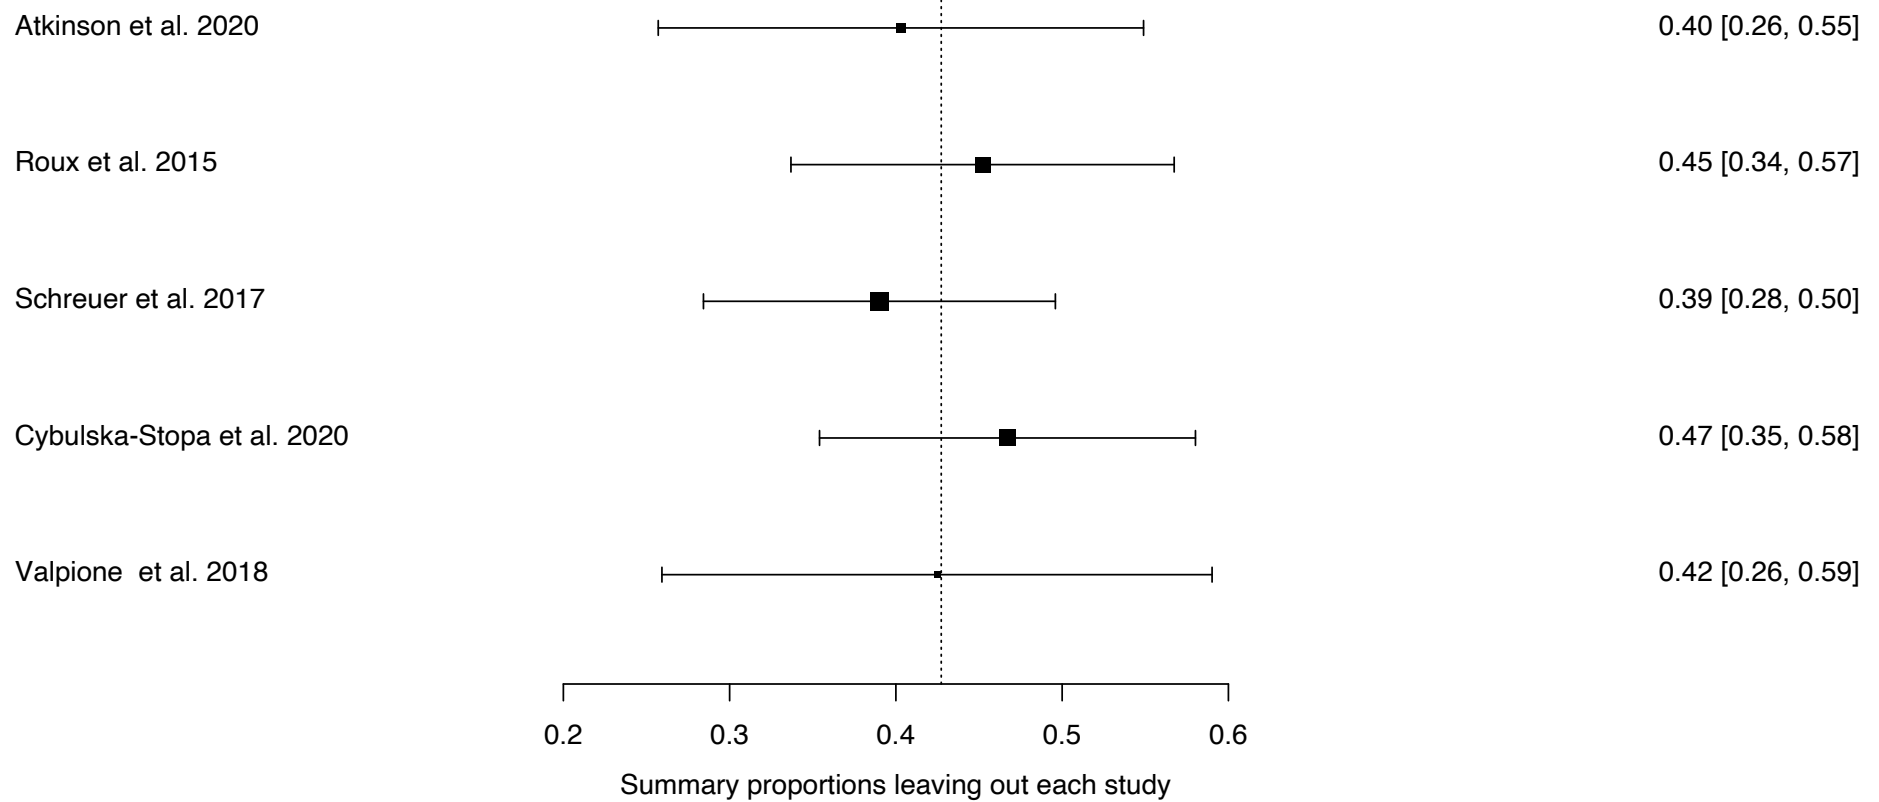

Supplement: s1 [file s1]

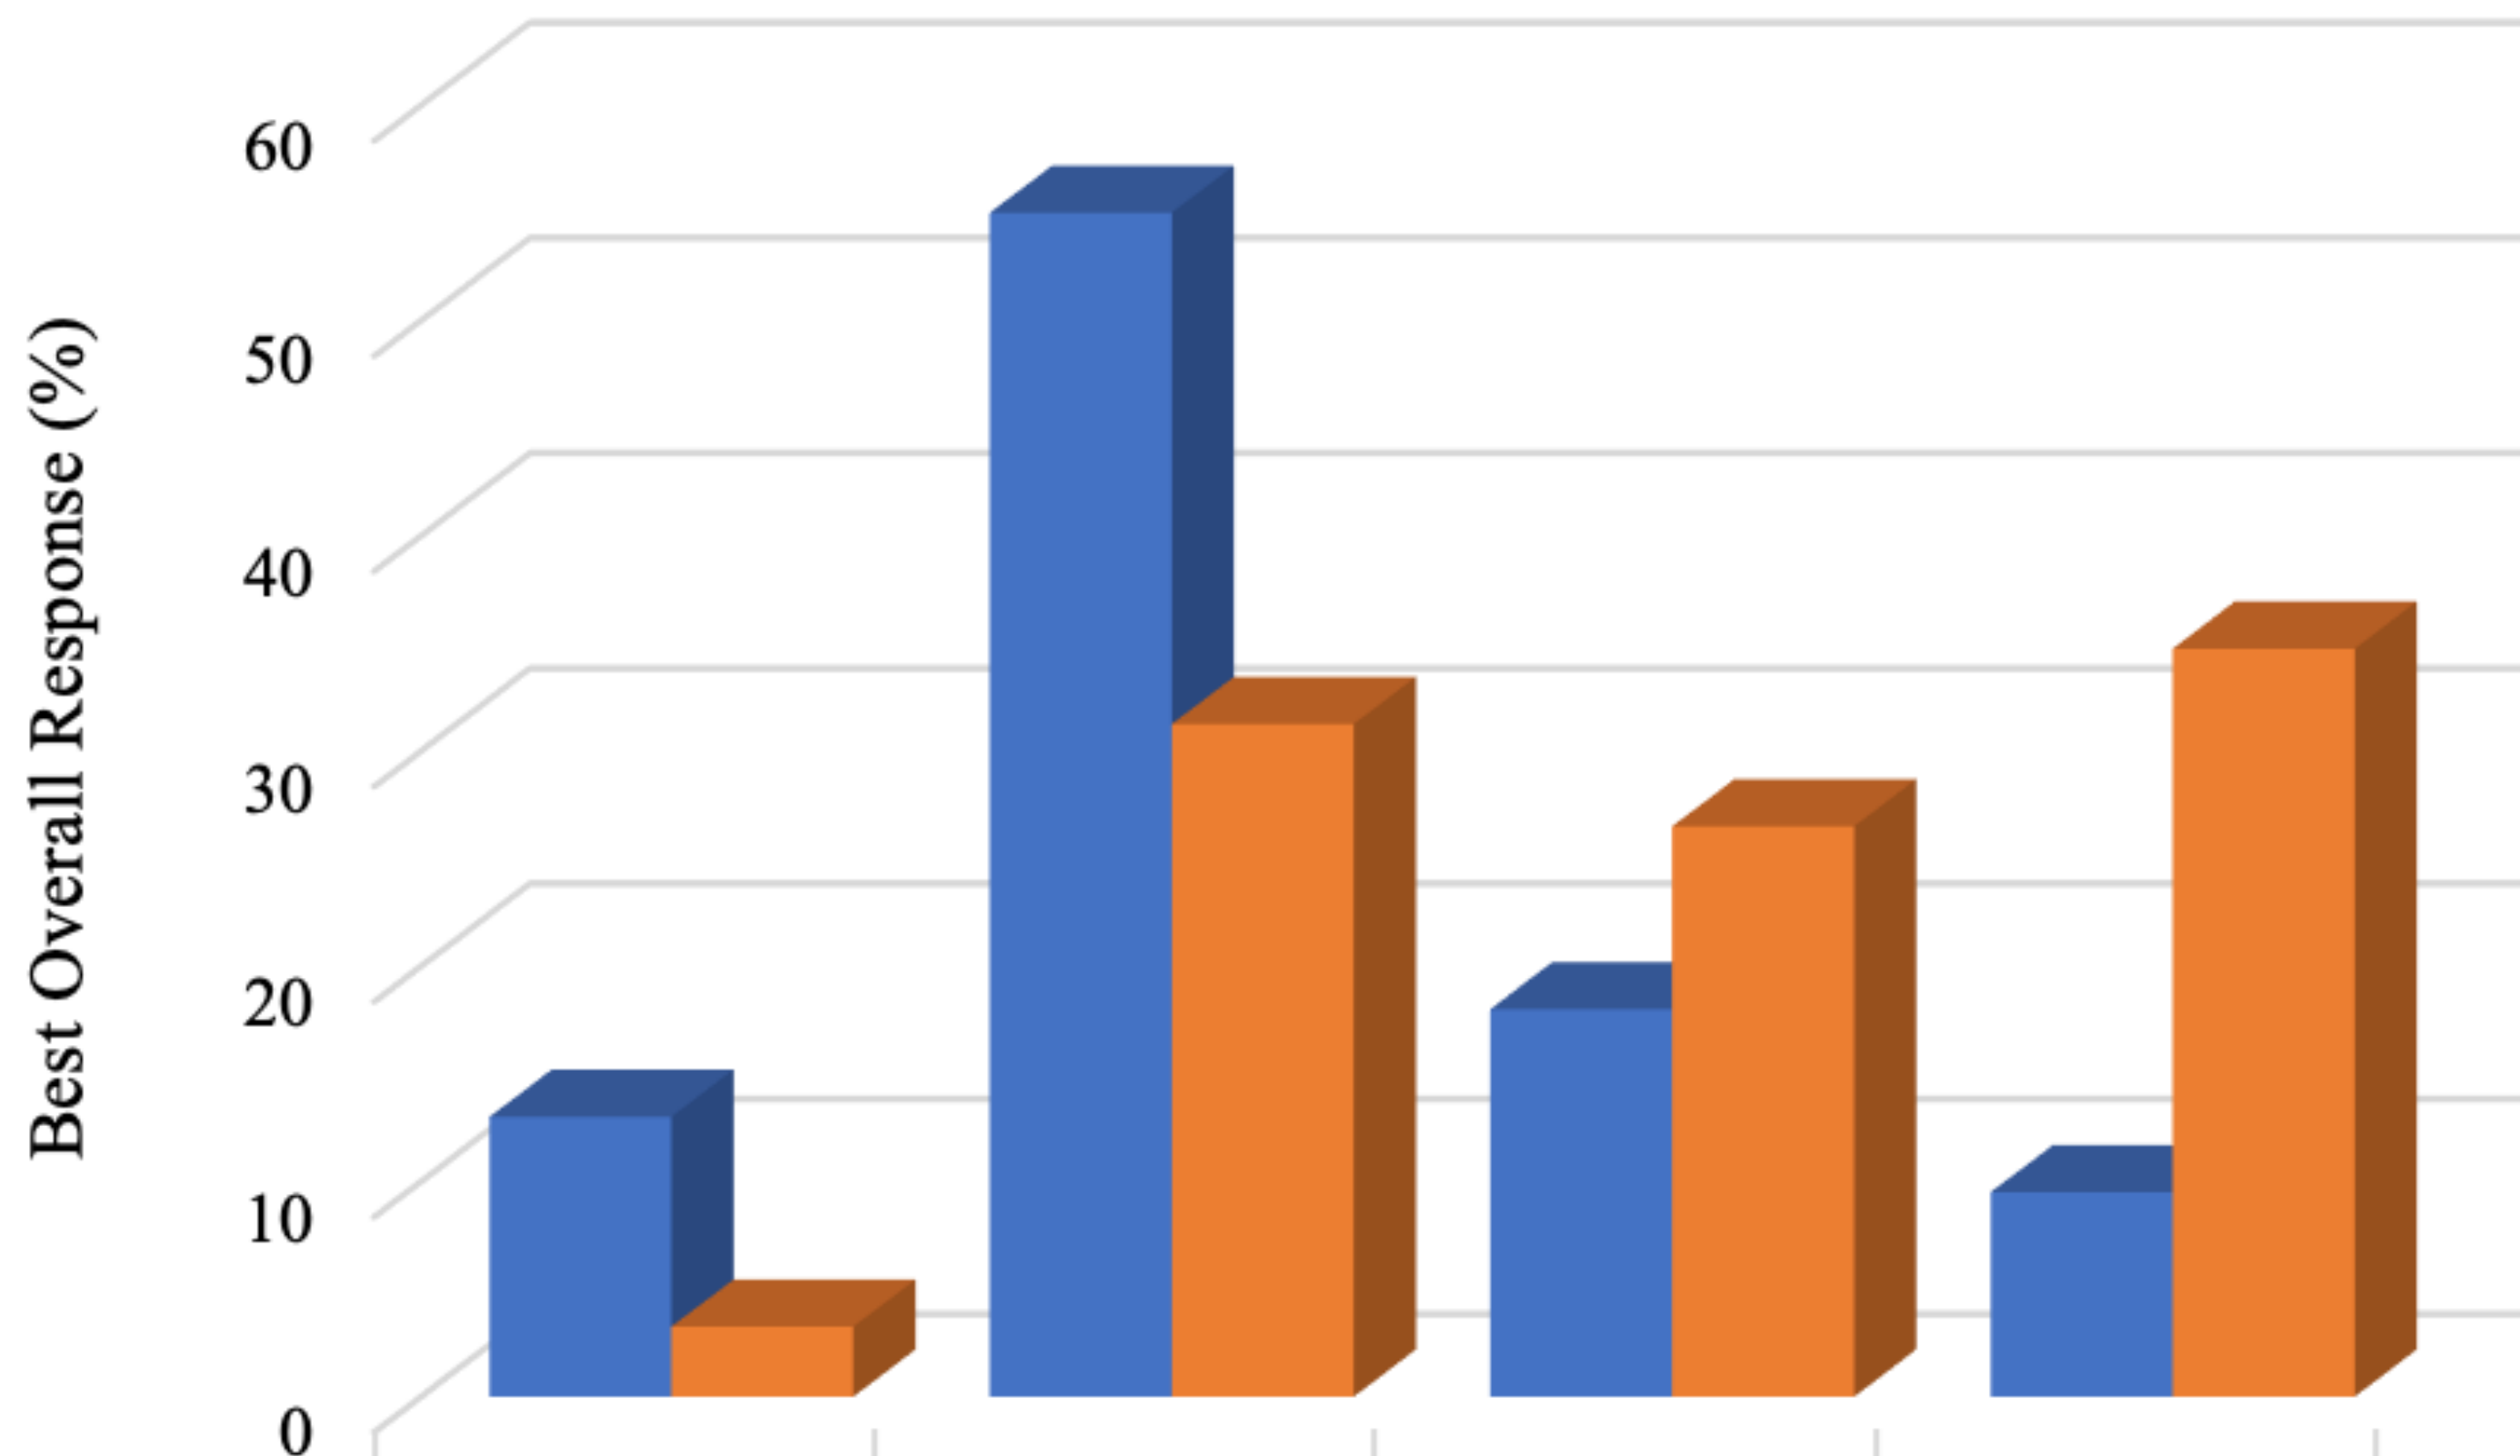

■ 1st TT exposure

■ TT Rechallenge

CR

PR

SD

PD

13

55

18

9.5

3.25

31.25

26.5

34.75

Supplement: s1 [file s1]

**A**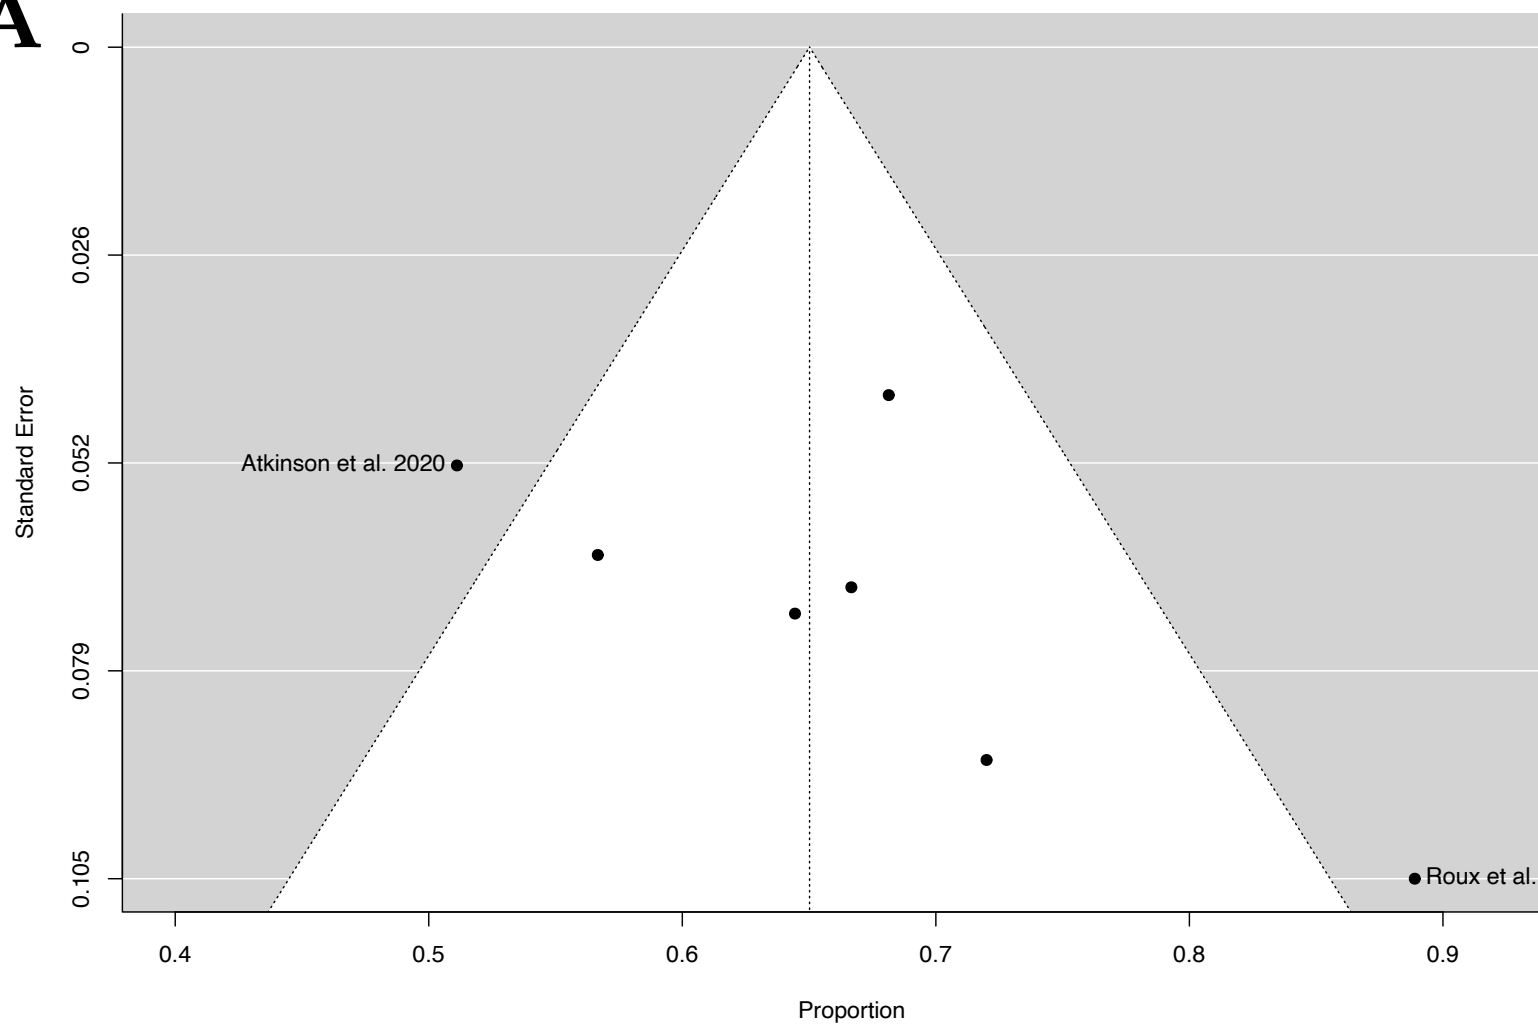**B**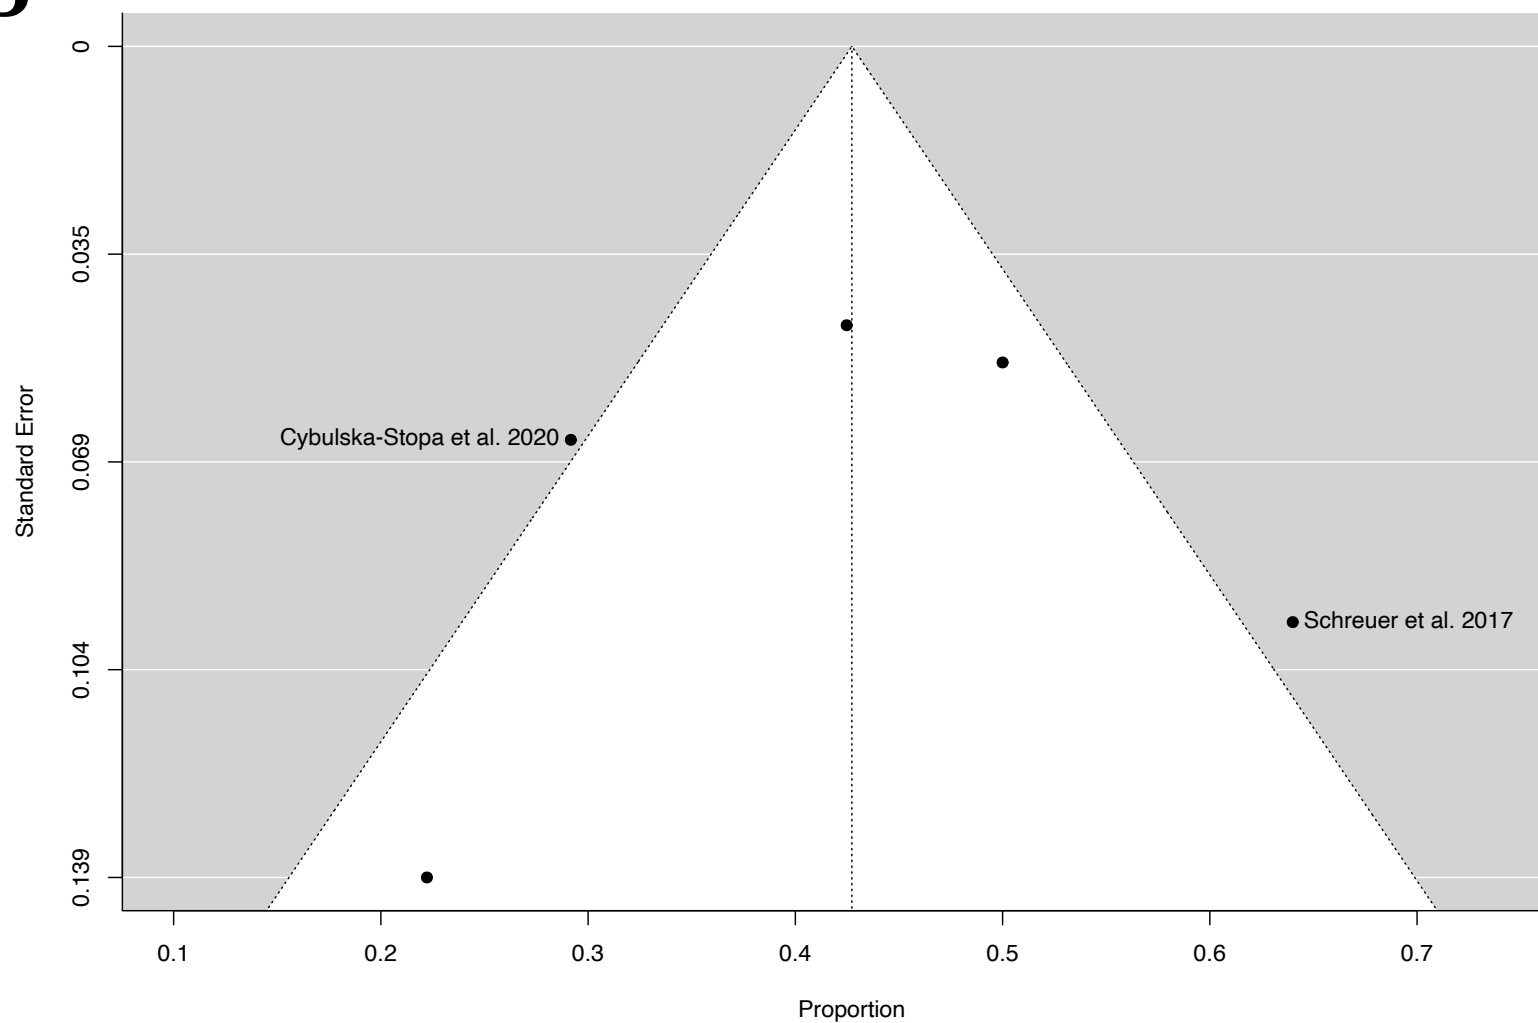

Supplement: s1 [file s1]
